# Supplementary material
Source: Springer Nature journal article supplement (https://www.springermedizin.de/resource/supplementary/12943_2013_1493_MOESM14_ESM.pdf/9552702)

**A**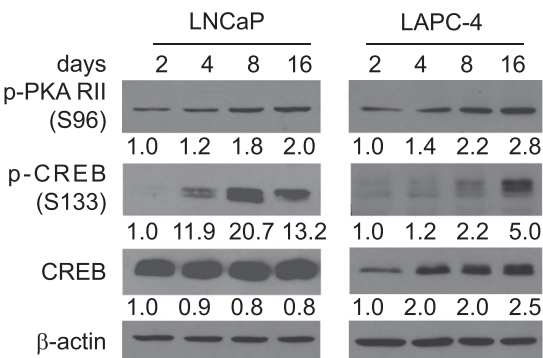**B**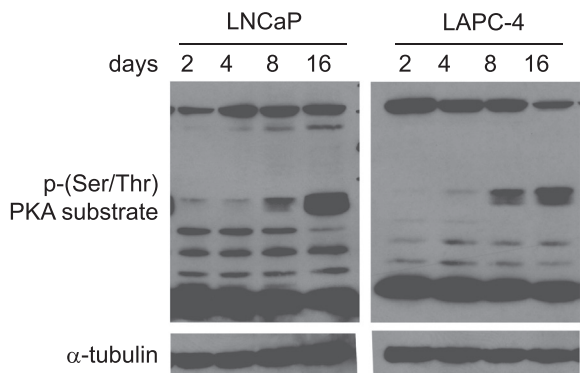**C**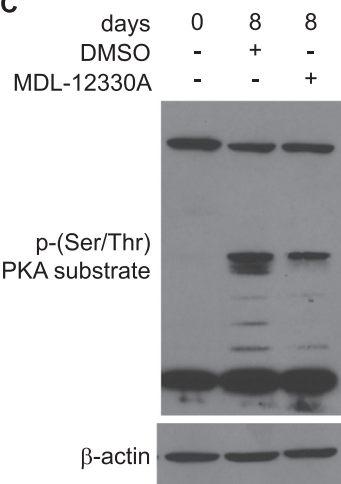**D**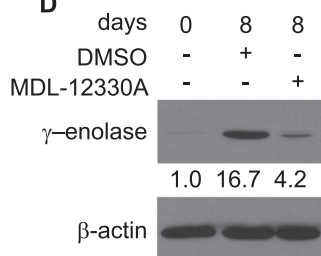**E**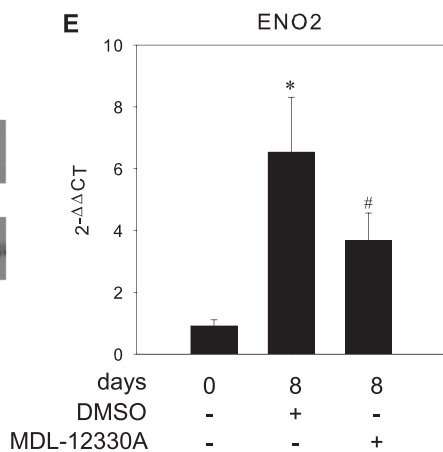**F**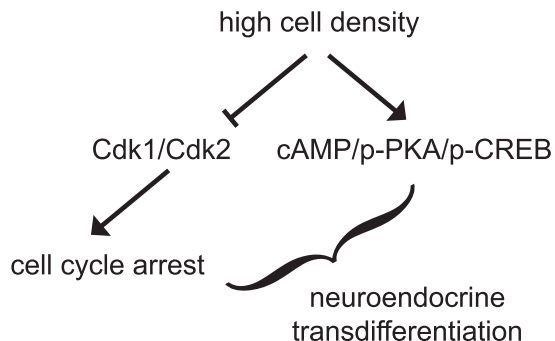

Supplement: MOESM14 [file 9552702]
